# Supplementary material
Source: PubMed Central journal article supplement (PMC5929470)
Supplement: NIHMS962586-supplement-Full_supplement.pdf [file NIHMS962586-supplement-Full_supplement.pdf]

## **Supplemental Information**

### **Remote control of mammalian cells with heat-triggered gene switches and photothermal pulse trains**

Ian C. Miller<sup>1</sup>, Marielena Gamboa Castro<sup>1</sup>, Joe Maenza<sup>1</sup>, Jason P. Weis<sup>1</sup>, & Gabriel A. Kwong<sup>1-5,\*</sup>

<sup>1</sup> *The Wallace H. Coulter Department of Biomedical Engineering, Georgia Institute of Technology & Emory University, Atlanta, GA 30332, USA*

<sup>2</sup> *Institute for Electronics and Nanotechnology, Georgia Institute of Technology, Atlanta, GA 30332, USA*

<sup>3</sup> *Parker H. Petit Institute of Bioengineering and Bioscience, Georgia Institute of Technology, Atlanta, GA 30332, USA*

<sup>4</sup> *Integrated Cancer Research Center, Georgia Institute of Technology, Atlanta, GA 30332, USA*

<sup>5</sup> *Georgia Immunoengineering Consortium, Emory University and Georgia Institute of Technology, Atlanta, GA 30332, USA*

\* Corresponding Author: Gabe A. Kwong  
Address: Marcus Nanotechnology Building, 345 Ferst Drive, Atlanta, GA 30332, USA  
Phone: 404-385-3746  
Email: [gkwong@gatech.edu](mailto:gkwong@gatech.edu)

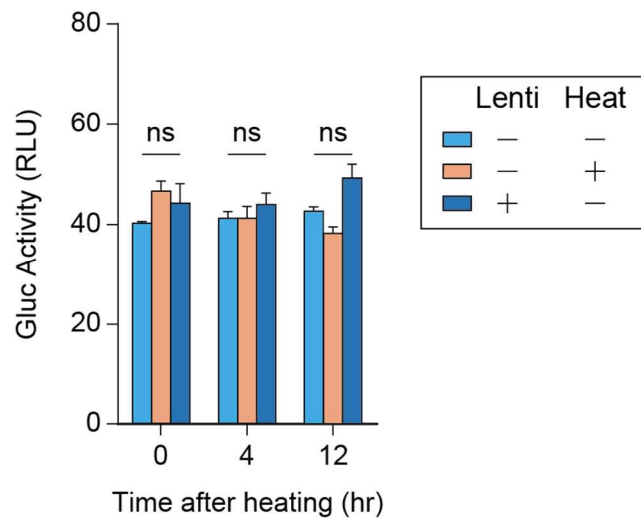

**Supplementary Figure 1. Basal activity of HSPA6 switch in Jurkat T cells.** T cell radiance after heating for 1 hr at 42 °C (+) or 37 °C (–) in cells transduced (+) or untransduced (–) with lentivirus, n = 3, two-way ANOVA and Dunnett’s multiple comparison test, error bars = SEM.

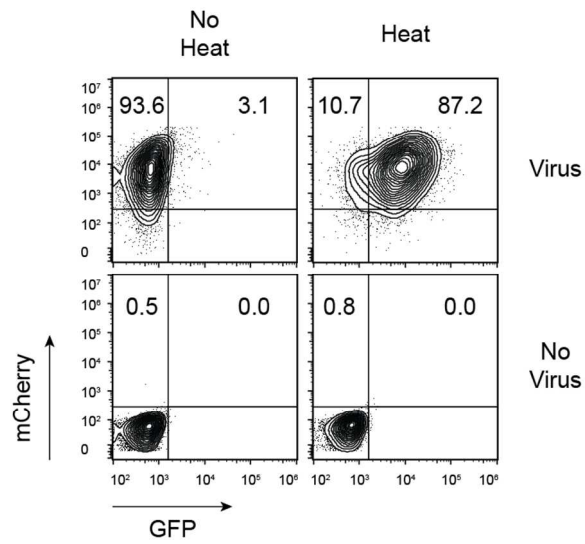

**Supplementary Figure 2. Heat actuation of engineered Jurkat T cells.** Thermal treatments of transduced or untransduced Jurkats containing a heat-activated GFP reporter and a constitutively expressed mCherry reporter under the SFFV promoter. Heating was performed for 15 min at 42 °C and cells were assayed 24 hrs after heating.

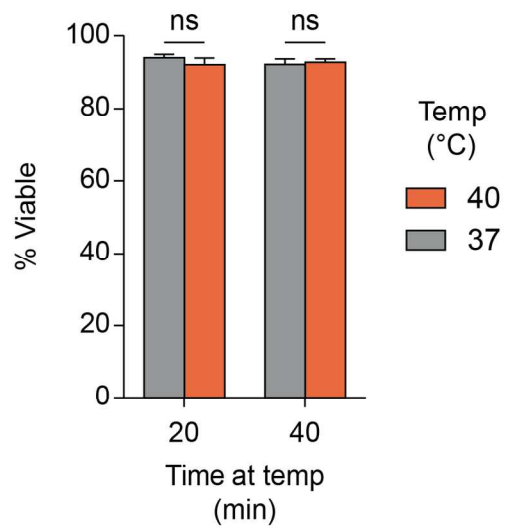

**Supplementary Figure 3. Mild hyperthermia is well-tolerated by Jurkat T cells.**

Quantification of PI and Annexin V viability stains of Jurkat T cells. Viable = PI<sup>-</sup>AnnexV<sup>-</sup> population 24 hr after heat, n = 3, two-way ANOVA with Bonferroni's multiple comparison test, error bars = SEM.

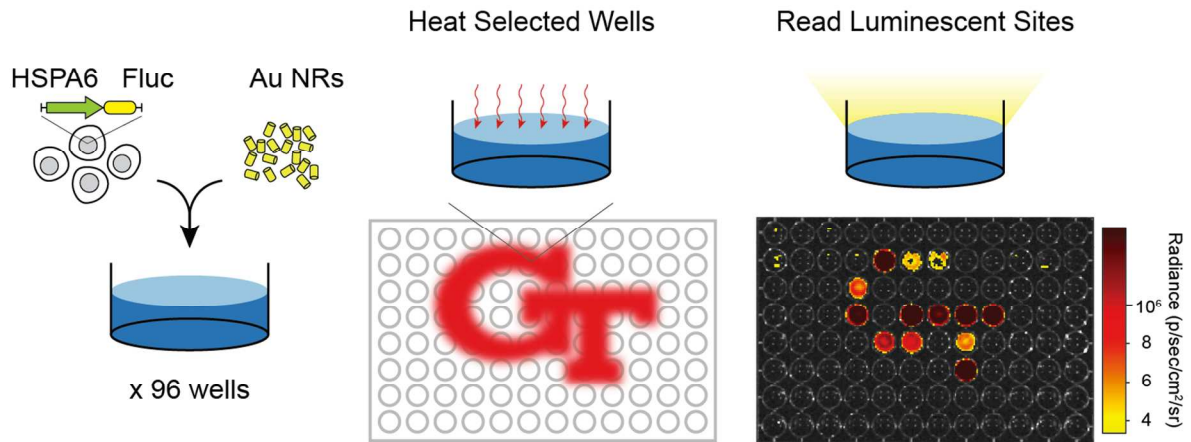

**Supplementary Figure 4. Spatially selective activation of thermal switches.** Select wells heated in pattern of the Georgia Tech logo using 808 nm laser light. Plate imaged with IVIS Spectrum CT 24 hrs after heating.

## Supplementary methods

*Switch Construction:* HSPA6 promoter sequences had XbaI and XhoI restriction sites added to the 5' and 3' ends respectively during PCR amplification before being digested and ligated into the Lego-C plasmid (Addgene #27348). Annealing sequences for the primers are listed below:

- Forward
  - Constructs i and iv: tcattctgaattcccacaacacatgg
  - Constructs ii and vi: gatctgaatggaatggtctggattgaaga
  - Construct iii and vii: aattctaccactgaaccaccaatgc
  - Constructs iv and viii: cgaaagttcgcgggcg
- Reverse
  - Constructs i – iv: ggctgaagcttctgtcgga
  - Constructs v – viii: agtgaggctctccctgcggtttctct
